# Supplementary material
Source: PubMed Central journal article supplement (PMC3904501)
Supplement: NIHMS540065-supplement-1_si_001.pdf [file NIHMS540065-supplement-1_si_001.pdf]

# SUPPORTING INFORMATION

## **Thermoresponsive composite hydrogels with aligned macroporous structure by ice-templated assembly**

Hao Bai,<sup>\*,†</sup> Alessandro Polini,<sup>†</sup> Benjamin Delattre,<sup>†</sup> Antoni P. Tomsia<sup>†</sup>

<sup>†</sup>Materials Sciences Division, Lawrence Berkeley National Laboratory, Berkeley, California 94720, United States

\*E-mail: [hbai@lbl.gov](mailto:hbai@lbl.gov)

**Table S1.** Composition of the solutions with the same amount of monomer (1 mol/L) and initiator (0.02 mol/L), but with different amounts of clay (5, 10, and 15  $\times 10^{-2}$  mol/L).

|       | NIPAAm<br>(mol/L) | Clay<br>(mol/L) | DEOP<br>(mol/L) | Water<br>(wt %) | NIPAAm<br>(wt %) | Clay<br>(wt %) | Clay/(Clay+polymer) |
|-------|-------------------|-----------------|-----------------|-----------------|------------------|----------------|---------------------|
| NC-5  | 1                 | 0.05            | 0.02            | 86.55           | 9.79             | 3.30           | 0.25                |
| NC-10 | 1                 | 0.1             | 0.02            | 83.78           | 9.48             | 6.39           | 0.40                |
| NC-15 | 1                 | 0.15            | 0.02            | 81.19           | 9.19             | 9.28           | 0.50                |

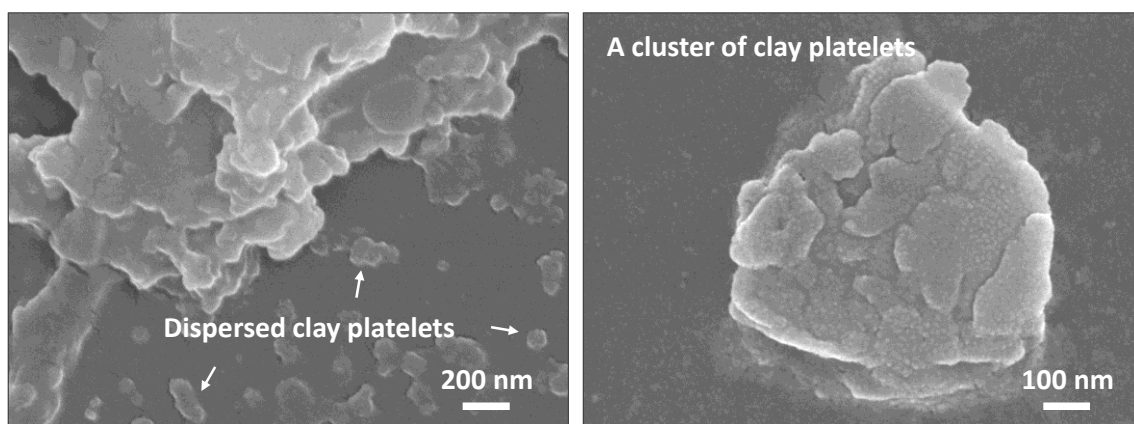

**Figure S1.** SEM images of clay platelets that have a diameter of  $\sim 100$  nm, and a thickness of  $\sim 1$  nm.

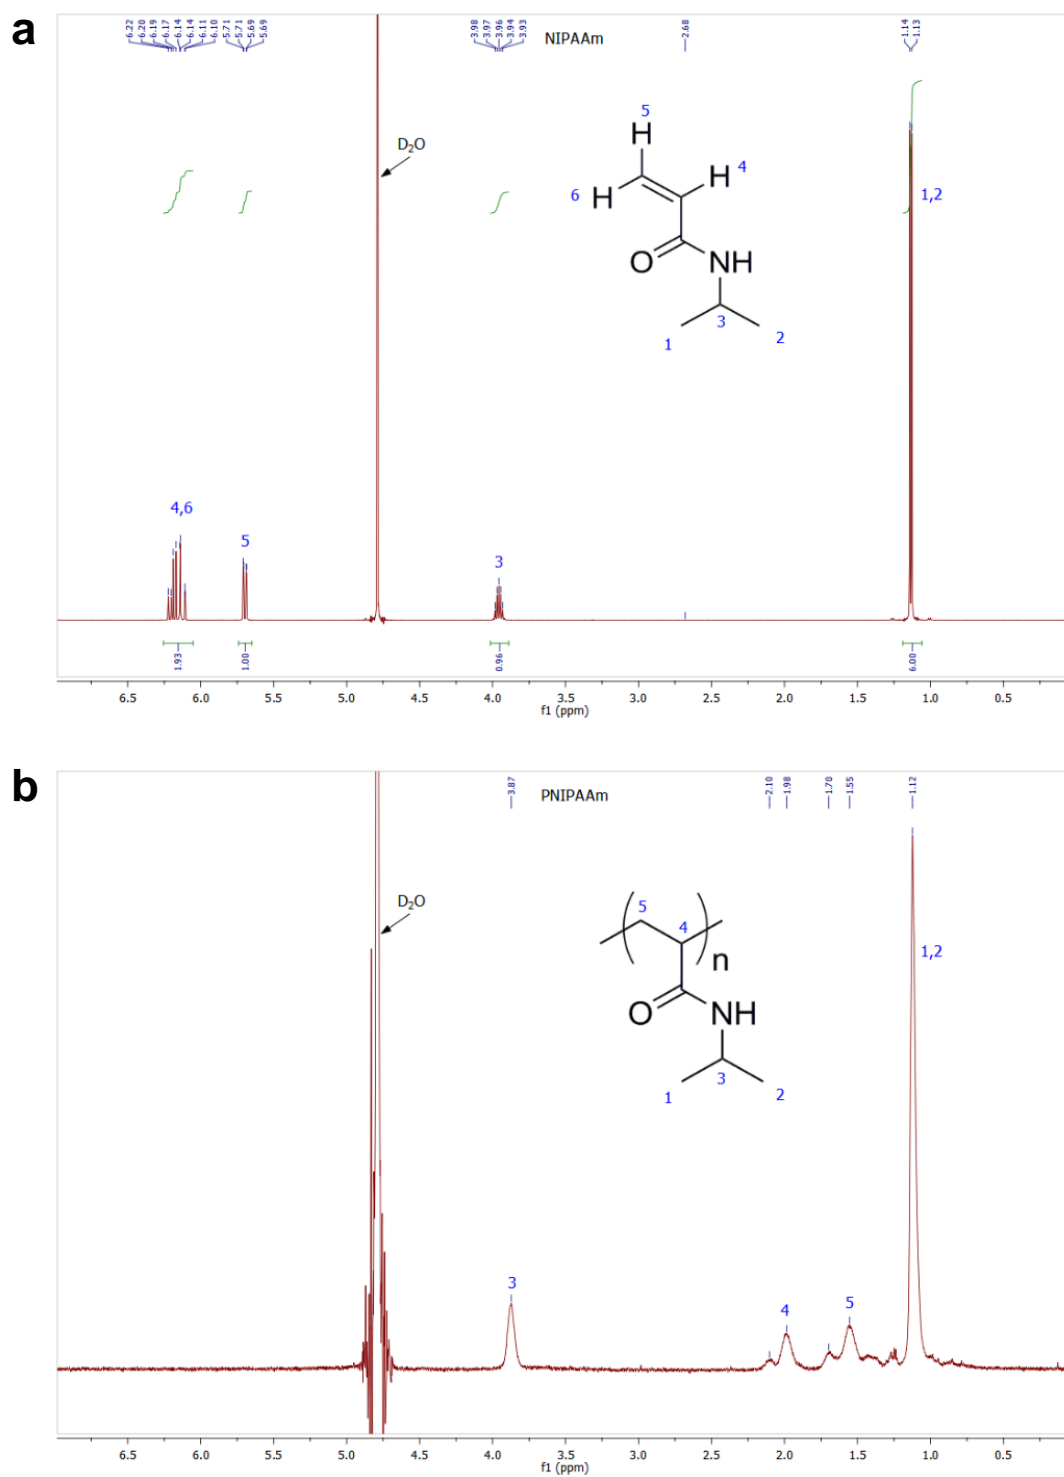

**Figure S2.**  $^1\text{H}$  NMR spectra of (a) NIPAAm and (b) PNIPAAm, which shows full conversion of monomer.

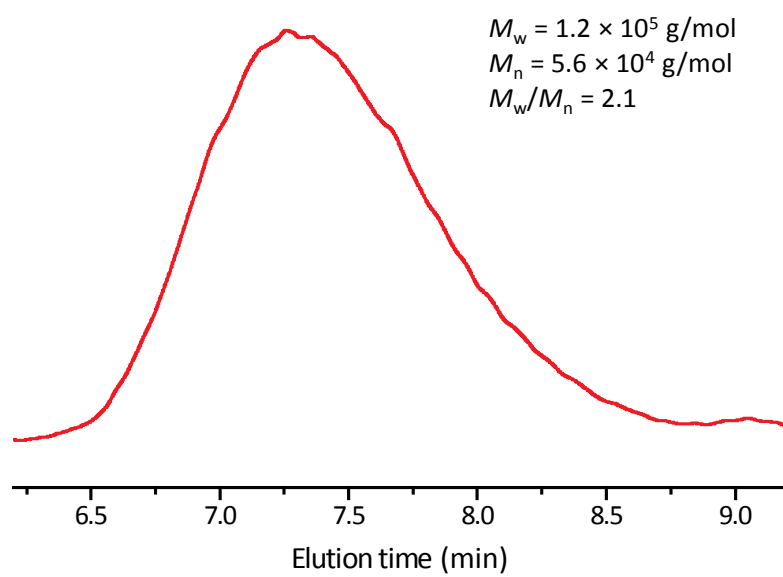

**Figure S3.** Gel permeation chromatography (GPC) measurement of PNIPAAm extracted through removing clay platelets.

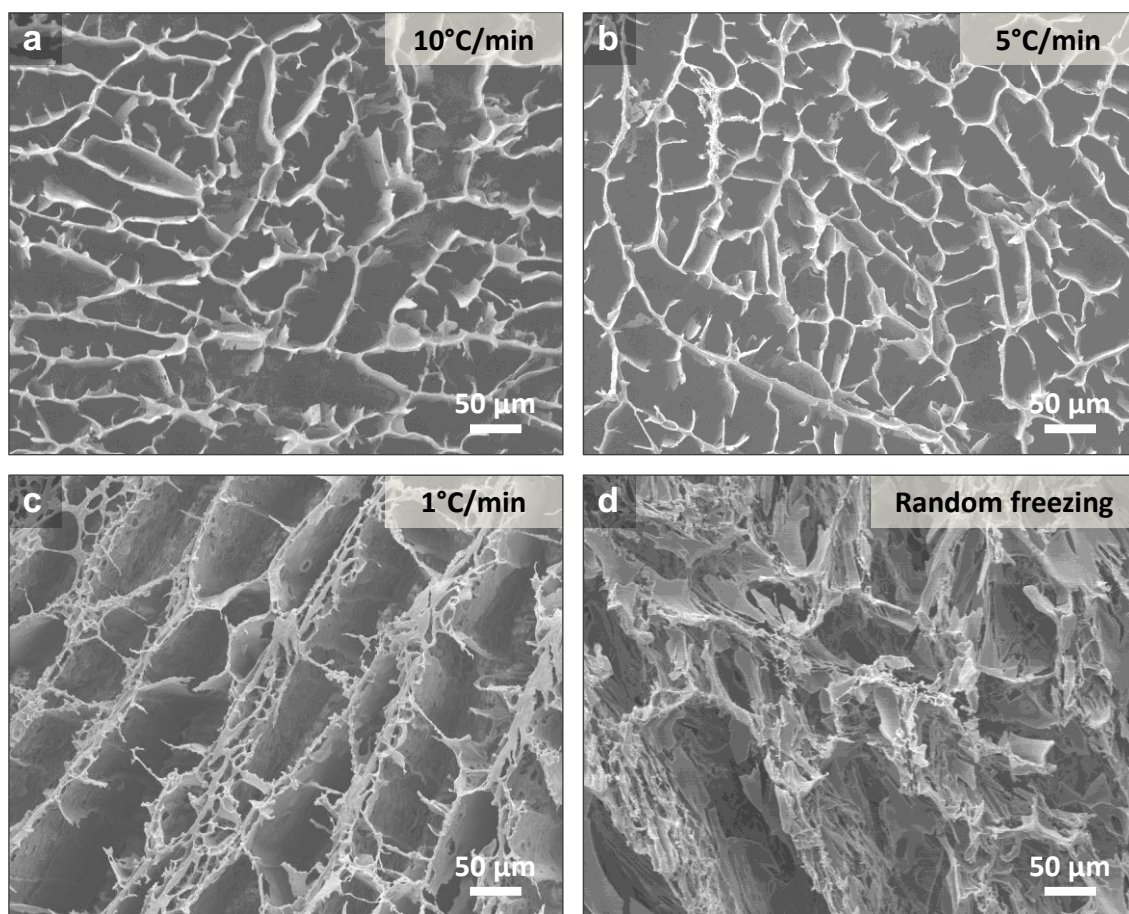

**Figure S4.** SEM images of the samples (before polymerization) prepared by freeze-casting at a cooling rate of a) 10, b) 5, and c) 1 °C/min, or d) random freezing. Pore size is shown to increase with decreasing cooling rate.

**Table S2.** Mechanical properties (both parallel and perpendicular to the freezing direction) of NC-10 hydrogels fabricated by freeze-casting at different cooling rates and random freezing. Modulus was calculated from the period of stretch  $\lambda = 0 \sim 0.5$ , and fracture energy is calculated from the area under the stress-strain curve.

|                                | Modulus (kPa) | Tensile strength (kPa) | Stretch (mm/mm) | Fracture energy (J/m <sup>2</sup> ) |
|--------------------------------|---------------|------------------------|-----------------|-------------------------------------|
| NC-10, Parallel, Random        | 45.6 ± 21.8   | 14.8 ± 4.1             | 6.9 ± 0.5       | 144.9 ± 157.9                       |
| NC-10, Parallel, 10°C/min      | 53.2 ± 16.2   | 114.5 ± 16.9           | 8.8 ± 2.1       | 4124.1 ± 2503.4                     |
| NC-10, Parallel, 5°C/min       | 41.2 ± 17.1   | 106.3 ± 19.8           | 11.2 ± 2.41     | 5092 ± 1732.4                       |
| NC-10, Parallel, 1°C/min       | 38.1 ± 7.7    | 79.4 ± 22.9            | 10.2 ± 1.7      | 4212.9 ± 1118.4                     |
| NC-10, Perpendicular, Random   | 42.6 ± 3.7    | 23.1 ± 3.9             | 9.2 ± 0.5       | 1094.4 ± 320.3                      |
| NC-10, Perpendicular, 10°C/min | 41.1 ± 7.3    | 11.3 ± 0.3             | 5.9 ± 0.6       | 217.7 ± 20.4                        |
| NC-10, Perpendicular, 5°C/min  | 24 ± 0.4      | 18.2 ± 6.3             | 12.1 ± 0.2      | 450.9 ± 164.2                       |
| NC-10, Perpendicular, 1°C/min  | 21.9 ± 20.4   | 20.9 ± 2.8             | 17.5 ± 1.5      | 1553.7 ± 386.9                      |
